# Supplementary material for: Green synthesis of gardenia seeds-based carbon dots for bacterial imaging and antioxidant activity in aqueous and oil samples
Source: PubMed Central journal article supplement — RSC Adv. 2023 Oct 6;13(42):29283–90. doi: 10.1039/d3ra06293g (PMC10557051; doi:10.1039/d3ra06293g), 2023-10-06
Supplement: RA-013-D3RA06293G-s001.pdf [file RA-013-D3RA06293G-s001.pdf]

## Supporting information

### Green synthesis of gardenia seeds-based carbon dots for bacterial imaging and antioxidant activity in aqueous and oil samples

Hung-Wen Tsai<sup>1</sup>, Tsunghsueh Wu<sup>2</sup>, Chiu-Lan Hsieh<sup>3</sup>, Shih-Feng Fu<sup>4</sup>, Mei-Yao Wu<sup>5</sup>,  
and Yang-Wei Lin<sup>1,\*</sup>

<sup>1</sup> Department of Chemistry, National Changhua University of Education, 1 Jin-De Road, Changhua City, 50007, Taiwan

<sup>2</sup> Department of Chemistry, University of Wisconsin-Platteville, 1 University Plaza, Platteville, Wisconsin, 53818-3099, USA

<sup>3</sup> Graduate Institute of Biotechnology, National Changhua University of Education, 1 Jin-De Road, Changhua City, 50007, Taiwan

<sup>4</sup> Department of Biology, National Changhua University of Education, 1 Jin-De Road, Changhua City, 50007, Taiwan

<sup>5</sup> School of Post-baccalaureate Chinese Medicine, China Medical University, 91, Hsueh-Shih Road, Taichung, 40424, Taiwan

\* Correspondence: [linywjerry@cc.ncue.edu.tw](mailto:linywjerry@cc.ncue.edu.tw), Tel: 886-4-7232105-3553 (Y.-W. Lin)

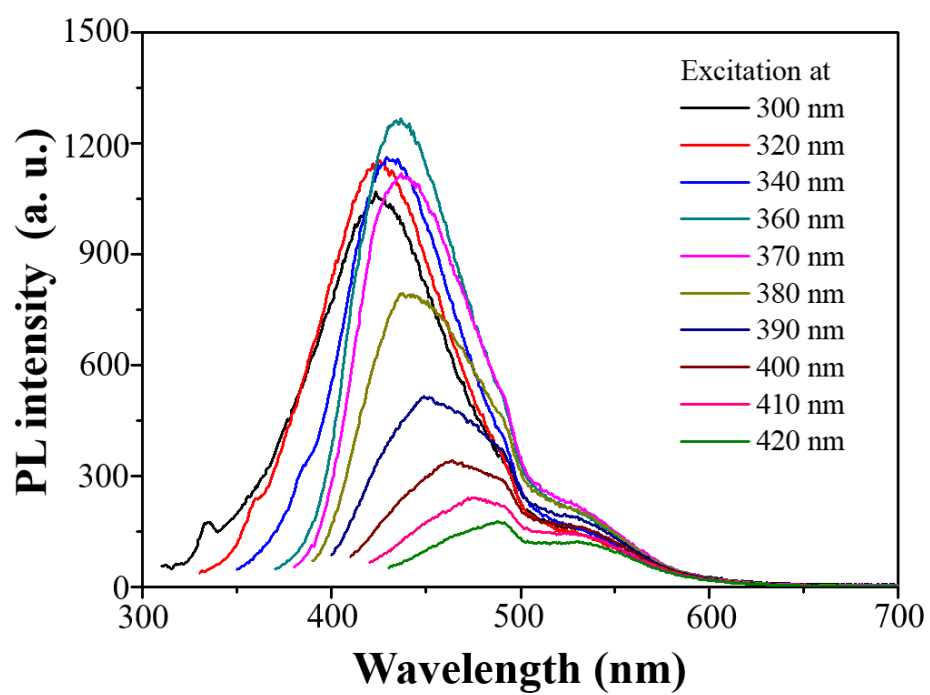

**Figure S1.** Excitation-dependent emissions spectra of GCDs-220.

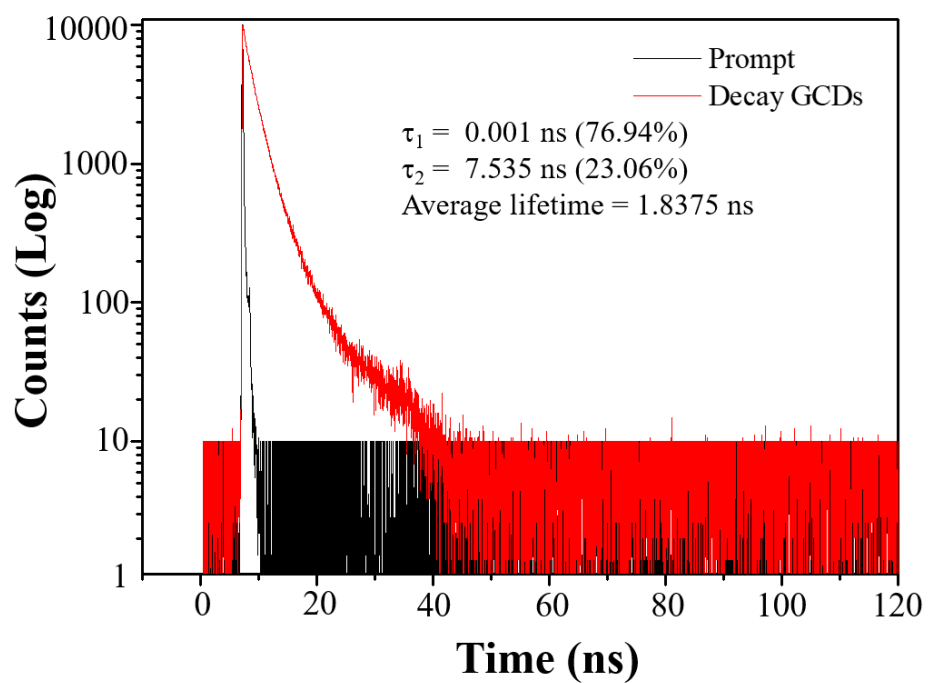

**Figure S2.** The decay curves of GCDs-220 in water were collected at 430 nm when excited at 375 nm.

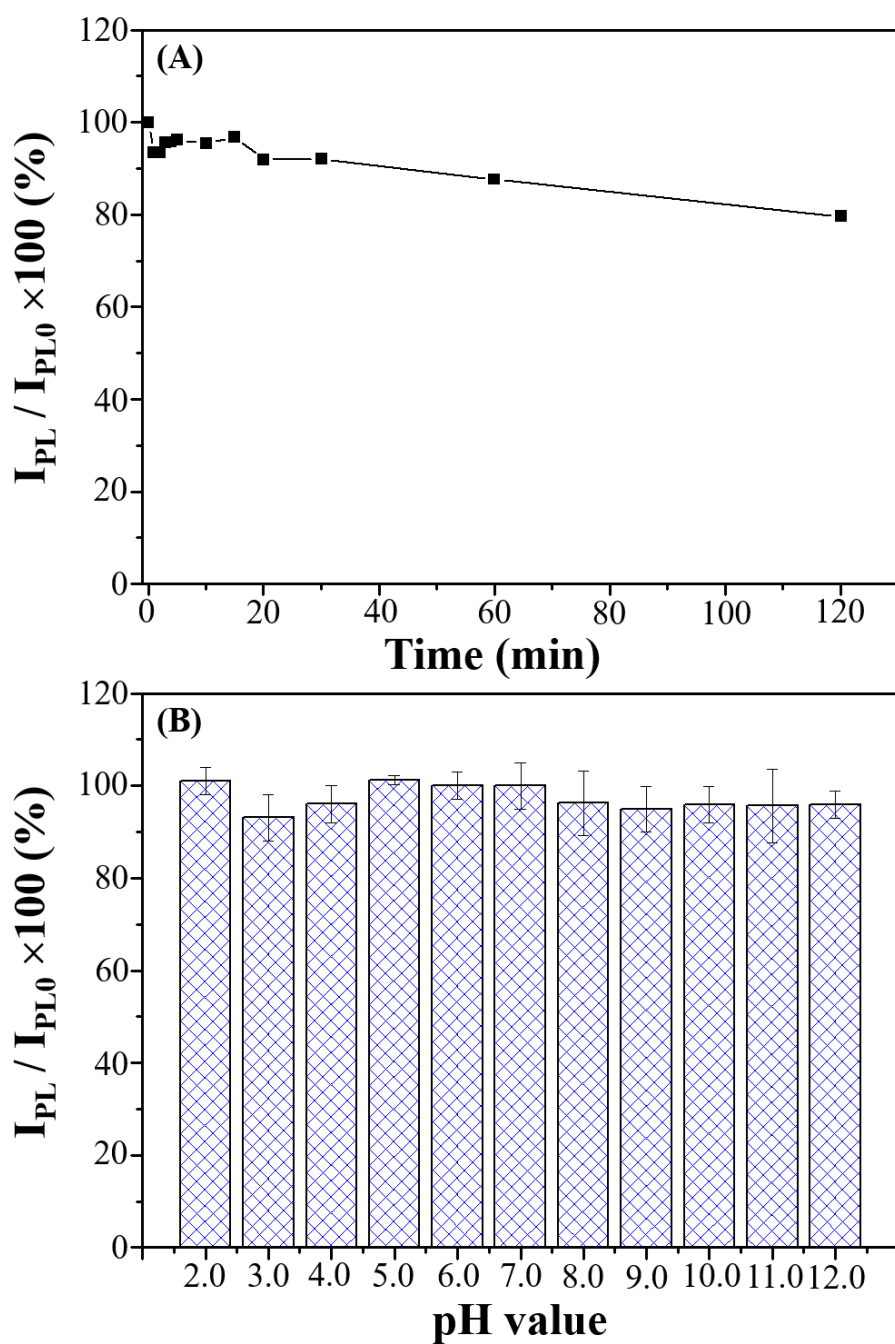

**Figure S3.** (A) The plot of the PL intensity at 450 nm of GCDs-220 under continuous irradiation of the 365 nm light with different time intervals. (B) pH dependence of PL response of GCDs-220 in various pH ranges.

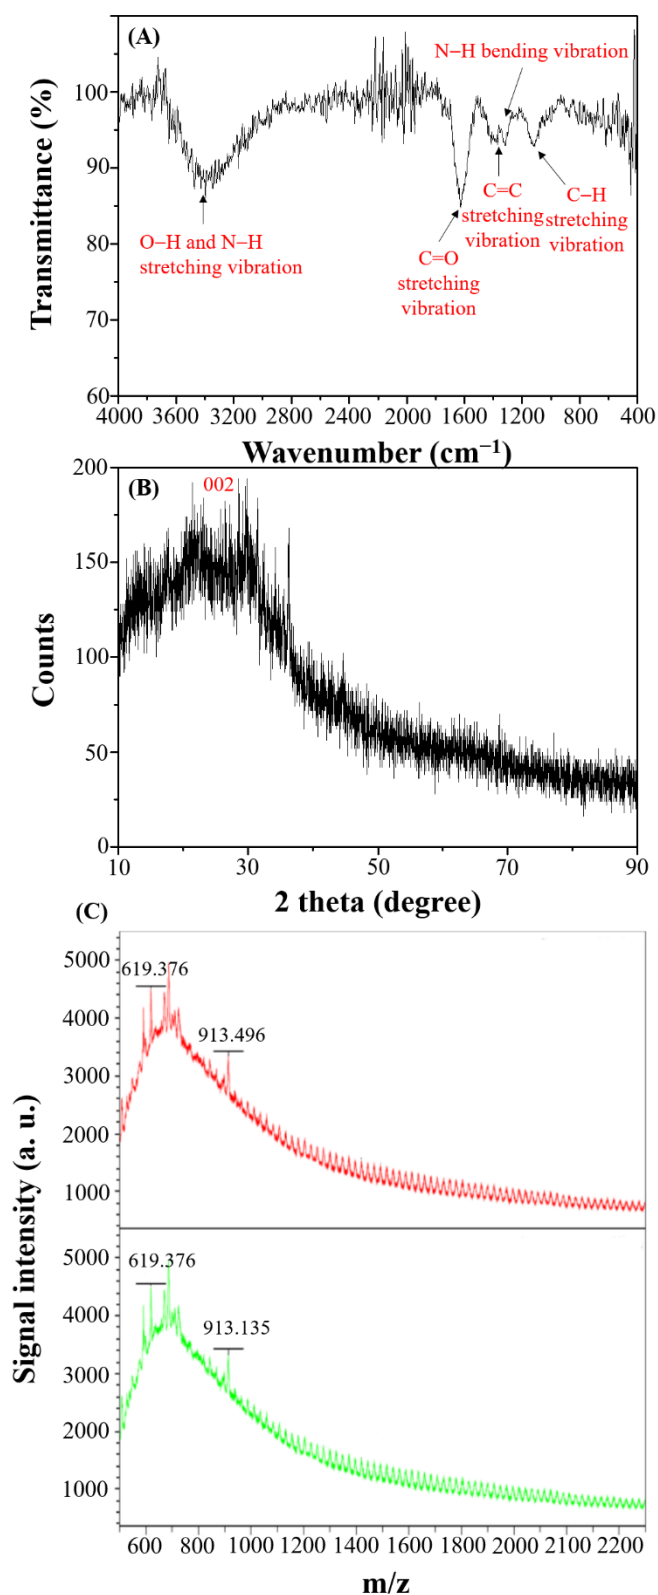

**Figure S4.** (A) FT-IR spectrum, (B) XRD pattern and (C) MS spectra (red: CHCA matrix, green: TFA matrix) of GCDs-220.

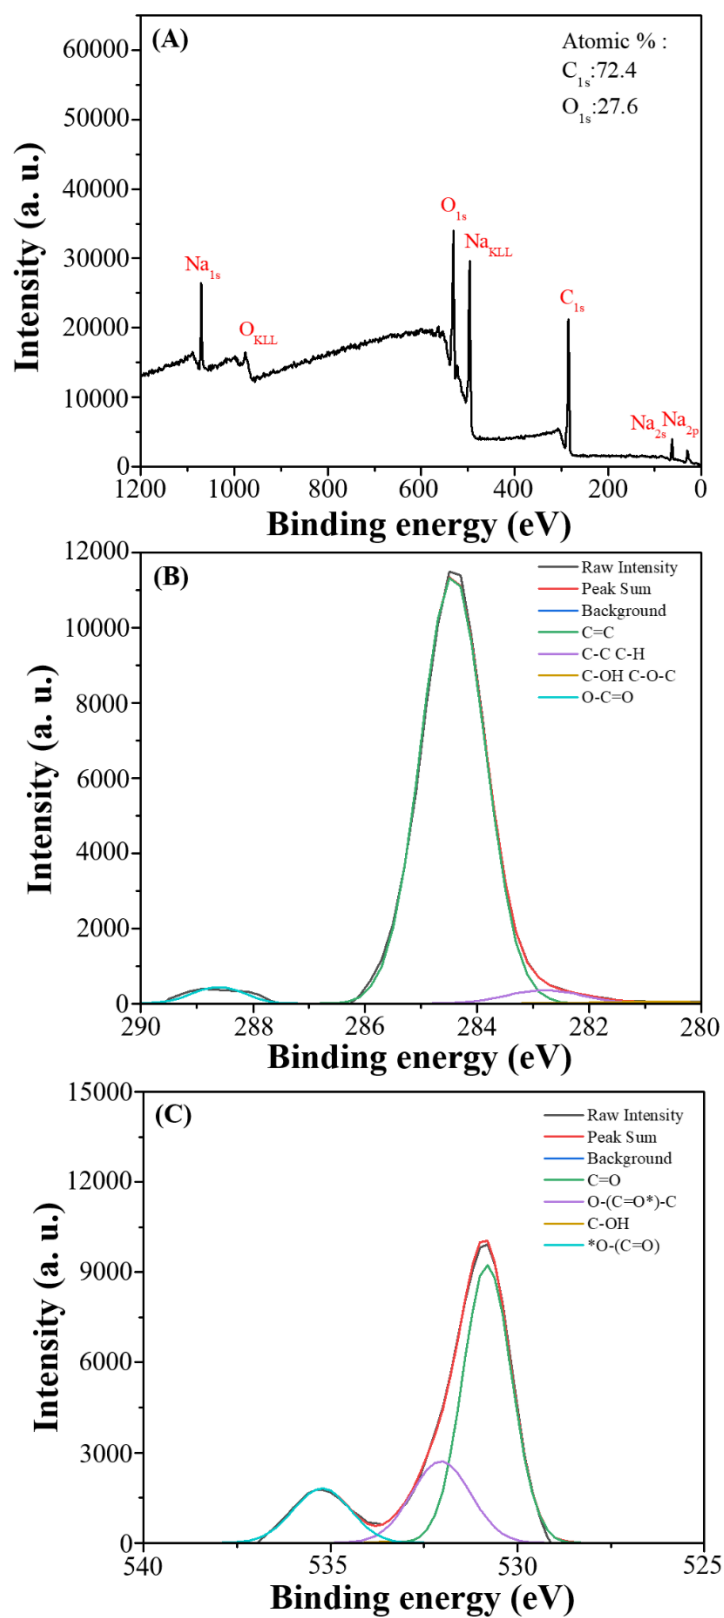

**Figure S5.** (A) Full range XPS analysis of GCDs-220. High-resolution XPS spectrum of the (B)  $\text{C}_{1s}$  and (C)  $\text{O}_{1s}$  region of GCDs-220.

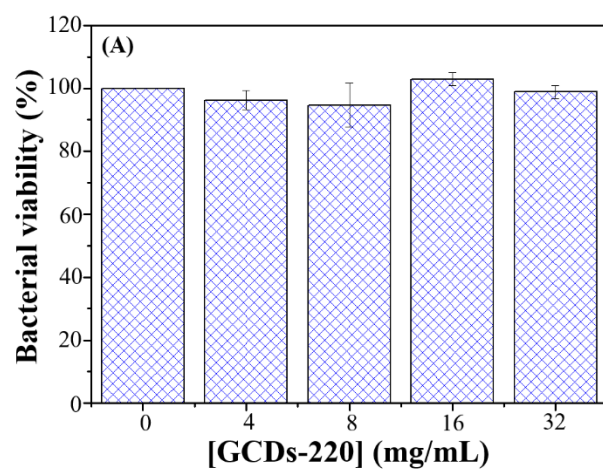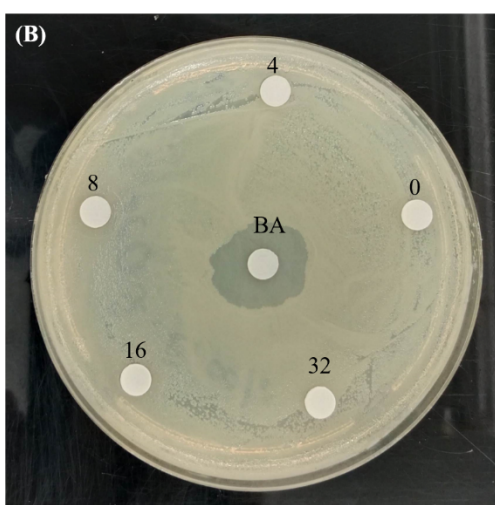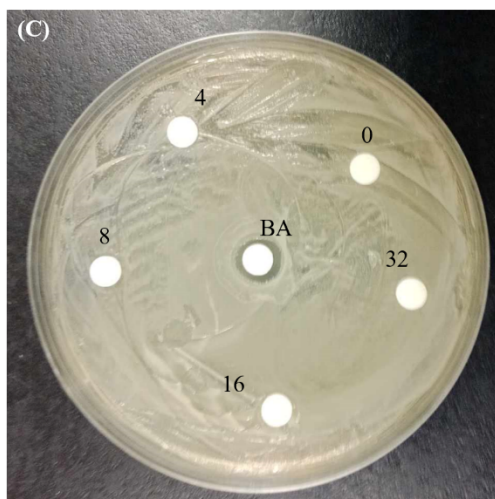

**Figure S6.** (A) Bacterial viability (%) of *E. coli* and photograph images of the inhibition zone of GCDs-220 (0, 4, 8, 16, and 32 mg/mL) and BA (32 mg/mL) against (B) *E. coli* and (C) *Staphylococcus aureus*.

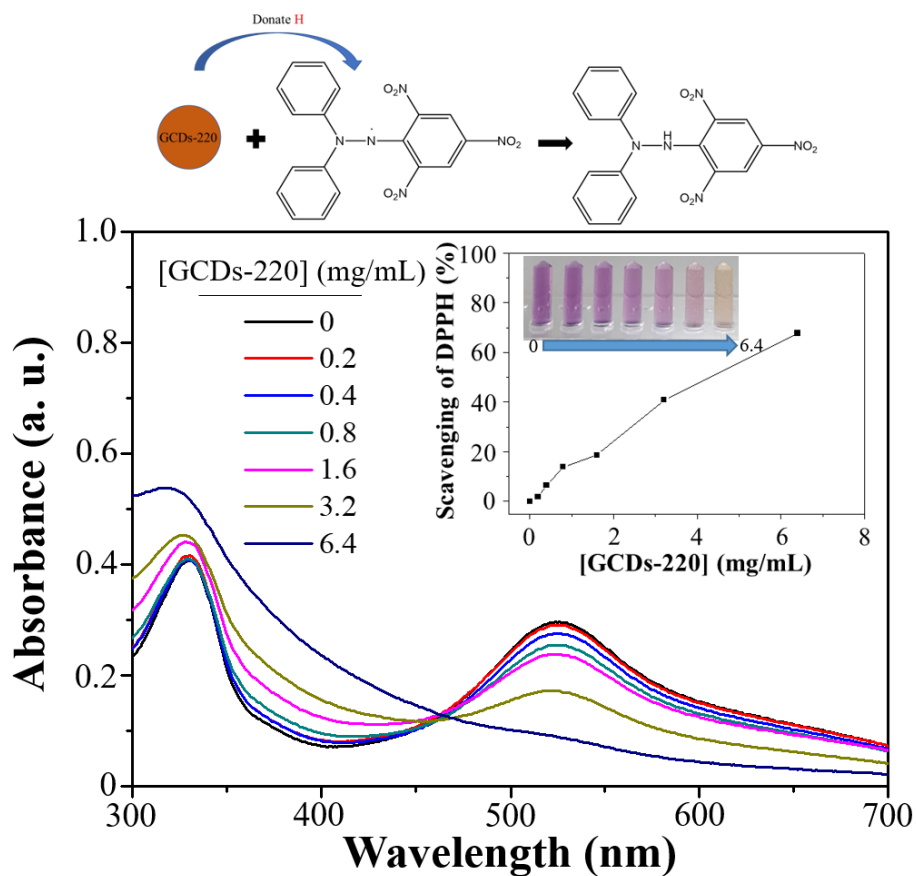

**Figure S7.** UV-Vis spectra of GCDs-220 (0, 0.2, 0.4, 0.8, 1.6, 3.2, and 6.4 mg/mL) in the presence of 0.1 mM DPPH (insets: antioxidant activity of GCDs-220 against DPPH· radicals and color changes of mixture solutions at various concentration of GCDs-220) and possible reaction mechanisms.



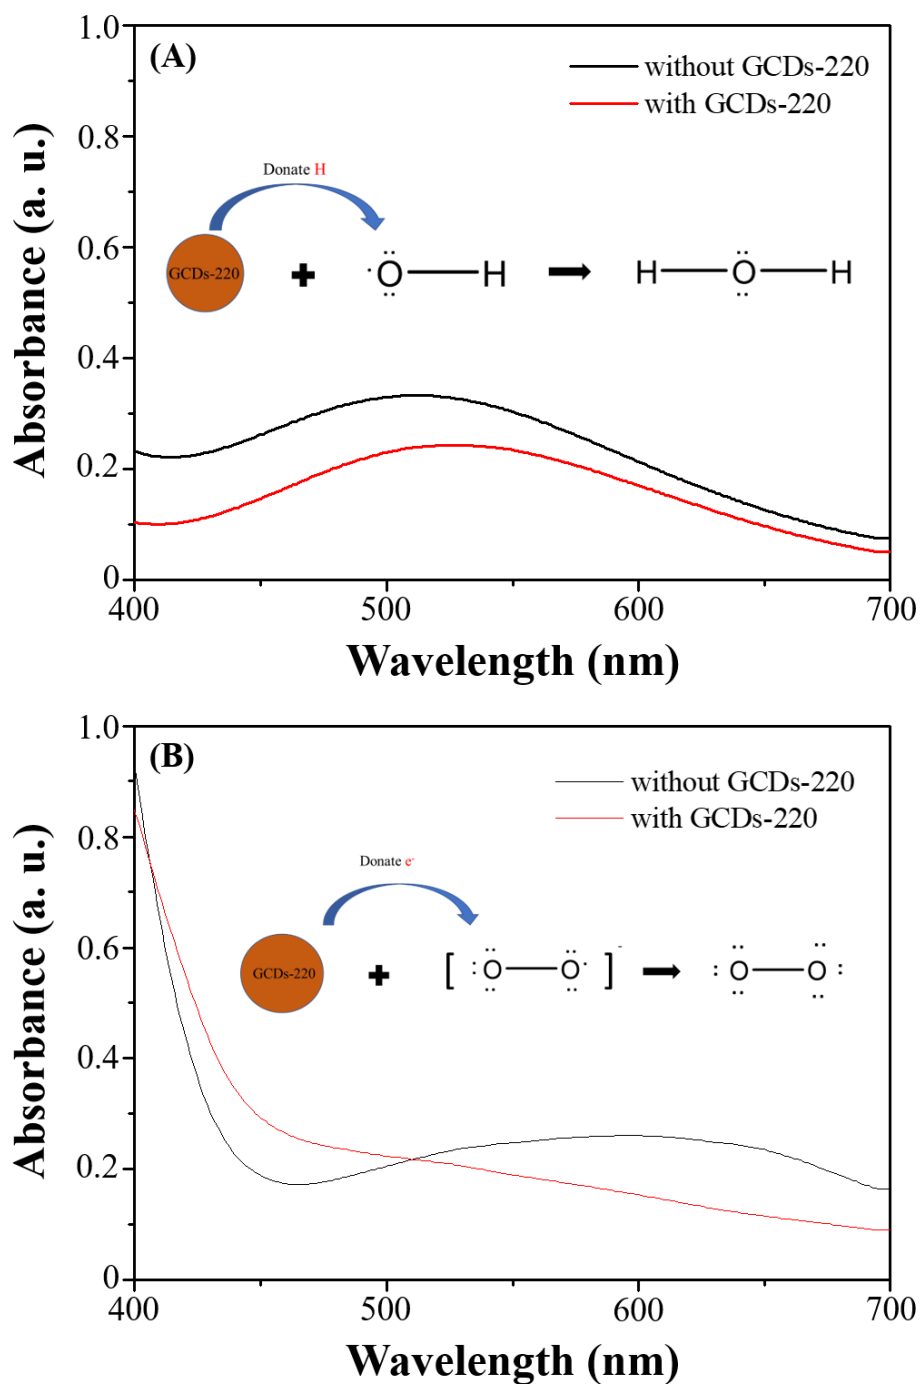

**Figure S8.** Antioxidant activities of GCD-220 against (A)  $\cdot\text{OH}$  and (B)  $\cdot\text{O}_2^-$  free radicals and possible reaction mechanism.

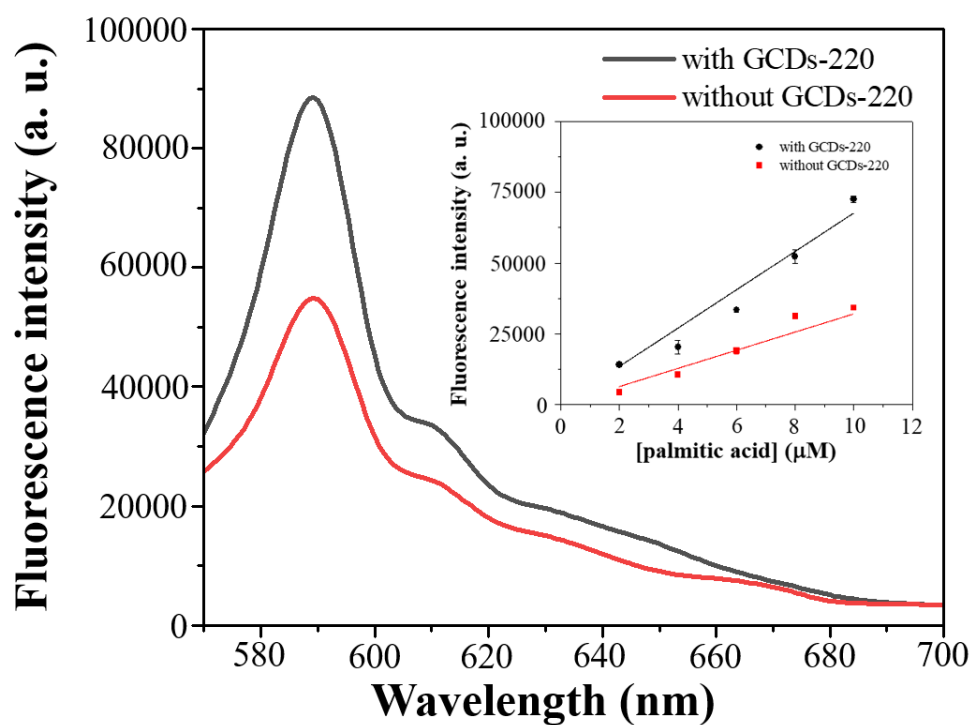

**Figure S9.** Fluorescence intensity of palmitic acid by a free fatty acid quantitation kit with/without GCDs-220 (1.28 mg/mL). Inset: the linear variation of fluorescence intensity of different palmitic acid concentrations by a free fatty acid quantitation kit with/without GCDs-220.
